# Supplementary material for: A polyelectrolyte-containing copolymer with a gas-switchable lower critical solution temperature-type phase transition
Source: Royal Society of Chemistry journal article supplement (doi:10.1039/c8py01265b), 2018-11-22
Supplement: c8py01265b1.pdf [file c8py01265b1.pdf]

Supporting information

## **Polyelectrolyte-Containing Copolymer with Gas Switchable Lower Critical Solution Temperature-Type Phase Transition**

Jin-Jin Li,<sup>ab</sup> Yin-Ning Zhou,<sup>ab</sup> Zheng-Hong Luo<sup>\*b</sup> and Shiping Zhu<sup>\*ac</sup>

a Department of Chemical Engineering, McMaster University, Hamilton, ON, L8S 4L7, Canada.

b Department of Chemical Engineering, School of Chemistry and Chemical Engineering, Shanghai Jiao Tong University, Shanghai, 200240, China.

c School of Science and Engineering, The Chinese University of Hong Kong, Shenzhen, 518172, China.

\*Corresponding author: Zheng-Hong Luo at SJTU: [luozh@sjtu.edu.cn](mailto:luozh@sjtu.edu.cn) ; Shiping Zhu at McMaster: [shipingzhu@mcmaster.ca](mailto:shipingzhu@mcmaster.ca); [shipingzhu@cuhk.edu.cn](mailto:shipingzhu@cuhk.edu.cn)

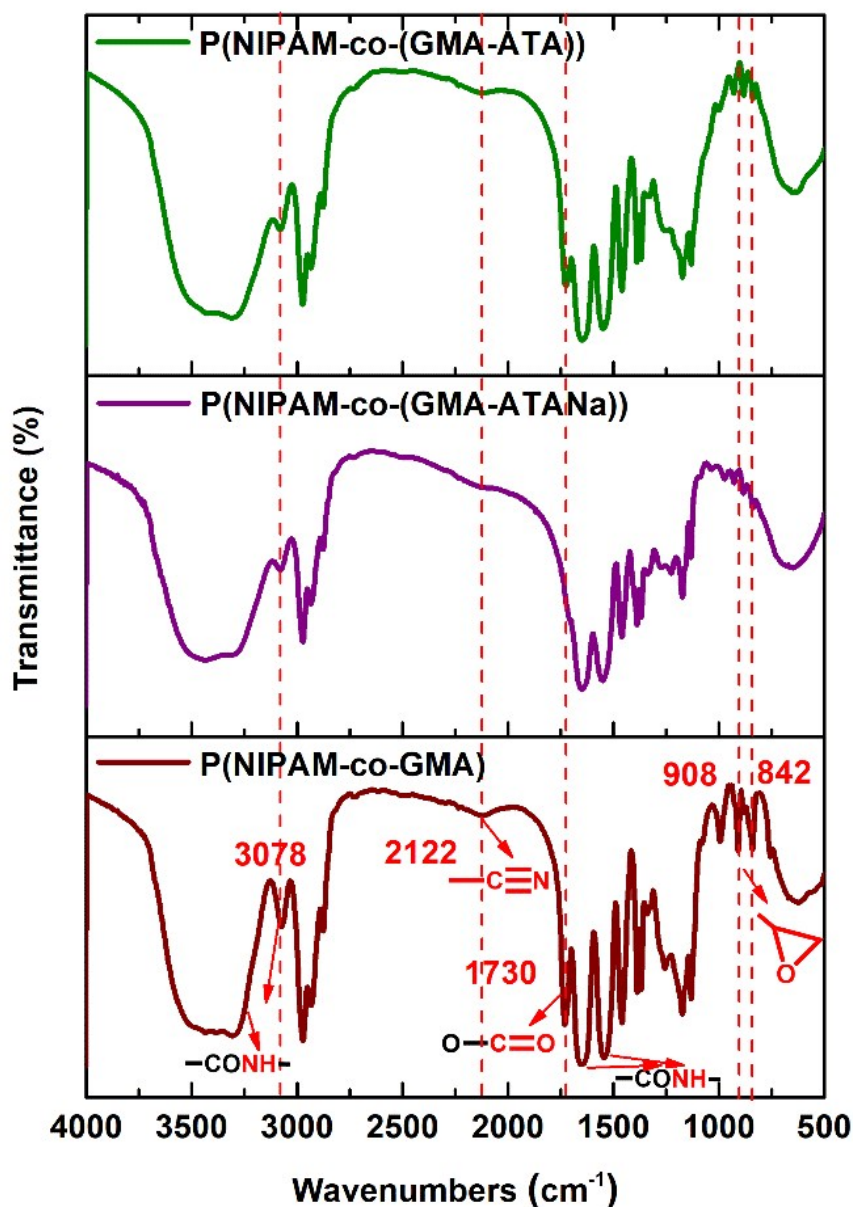

**Figure S1.** FT-IR spectra of P(NIPAM-co-GMA), P(NIPAM-co-(GMA-ATANa)) and P(NIPAM-co-(GMA-ATA)).

First of all, a stretching vibration absorption band of nitrile group at  $2122\text{ cm}^{-1}$  was assigned to the RAFT agent, and the characteristic peaks of secondary amide (-CONH-) group of PNIPAM located at  $3350$  (broad),  $3078$ ,  $1645$ ,  $1550\text{ cm}^{-1}$  were identified in all the spectra. Compared to the FT-IR spectrum of P(NIPAM-co-GMA), the characteristic absorption bands of epoxy group stretching vibration at  $908$  and  $842\text{ cm}^{-1}$  were not detectable after post-polymerization functionalization, indicating a successful ring-opening reaction.<sup>1,2</sup> Additionally, due to the incorporation of triazole ring, the ester group stretching vibration located at  $1730\text{ cm}^{-1}$  was included into the absorption band

of -CONH-. Unfortunately, the characteristic absorption bands of triazole ring at 1640 and 1560  $\text{cm}^{-1}$  were overlapped by the signals of PNIPAM.

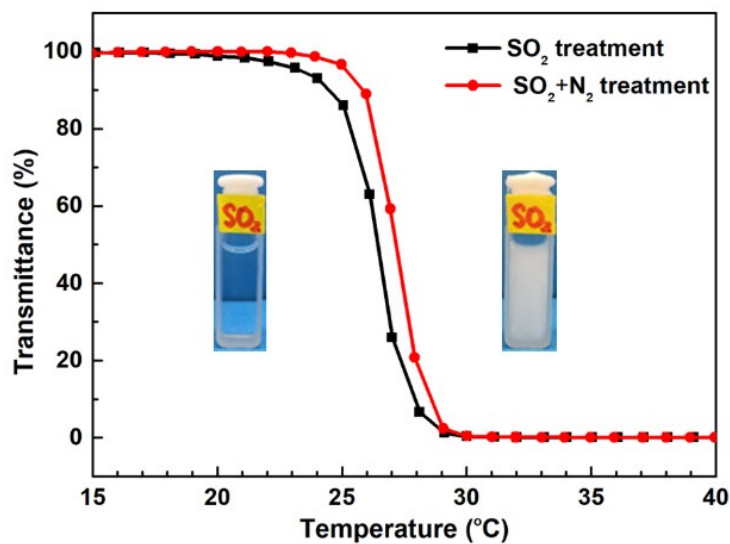

**Figure S2.** Temperature dependent transmittance curves of P(NIPAM-co-(GMA-ATANa)) aqueous solution after 5 min  $\text{SO}_2$  bubbling and its reversibility based on  $\text{N}_2$  bubbling (40 h).

#### References

- (1) J. Zhu, L. Wu, Z. Bu, S. Jie and B.-G. Li, *Ind. Eng. Chem. Res.*, 2017, 56, 10155-10163.
- (2) S. Ü. Çelik, Ü. Akbey, A. Bozkurt, R. Graf and H. W. Spiess, *Macromol. Chem. Phys.*, 2008, 209, 593-603.
